# Supplementary material for: A selenamorpholine-based redox-responsive fluorescent probe for targeting lysosome and visualizing exogenous/endogenous hydrogen peroxide in living cells and zebrafish
Source: Royal Society of Chemistry journal article supplement (doi:10.1039/c8tb03010c), 2019-01-01
Supplement: c8tb03010c1.pdf [file c8tb03010c1.pdf]

## Supplementary Information

### A simple selenamorpholine-based fluorescent probe for targeting lysosome and visualizing hydrogen peroxide in living cells and zebrafish

Chao Xu, Ying Qian\*

*School of Chemistry and Chemical Engineering, Southeast University, Nanjing 211189, China*

\*E-mail: [yingqian@seu.edu.cn](mailto:yingqian@seu.edu.cn)

### Index

**Scheme S1** Synthetic route of fluorescent probe BODIPY-Se

**Table S1** Properties of the reported lysosome-targeted fluorescent probes for H<sub>2</sub>O<sub>2</sub>.

**Fig. S1** Absorption spectra of BODIPY-Se at different concentrations of H<sub>2</sub>O<sub>2</sub> in EtOH-PBS solution.

**Fig. S2** Fluorescence responses of probe toward H<sub>2</sub>O<sub>2</sub> and other substances in EtOH-PBS solution.

**Fig. S3** The molecular orbitals for the ground states of BODIPY-Se, BODIPY-SeH, BODIPY-SeOH based on DFT (B3LYP/6-31G\*) calculations..

**Fig. S4** Cytotoxicity of different concentrations of BODIPY-Se to HepG2 cells by a standard MTS assay.

**Fig. S5** The intracellular fluorescence standard curve versus hydrogen concentration.

**Fig. S6** Fluorescence images of MCF-7 cells treated with 2 μM BODIPY-Se and different concentrations of vitamin C.

**Fig. S7** Confocal fluorescence images in zebrafish incubated with probe BODIPY-Se and subsequently treated with H<sub>2</sub>O<sub>2</sub> for different time.

**Fig. S8** <sup>1</sup>H NMR spectrum (CDCl<sub>3</sub>, 300 MHz) of BODIPY-Cl.

**Fig. S9** <sup>1</sup>H NMR spectrum (CDCl<sub>3</sub>, 300 MHz) of BODIPY-Se.

**Fig. S10** <sup>13</sup>C NMR spectrum (CDCl<sub>3</sub>, 75 MHz) of BODIPY-Se.

**Fig. S11** MS spectrum of BODIPY-Se.

**Fig. S12** ES-MS spectrum of BODIPY-Se in the presence of H<sub>2</sub>O<sub>2</sub>.

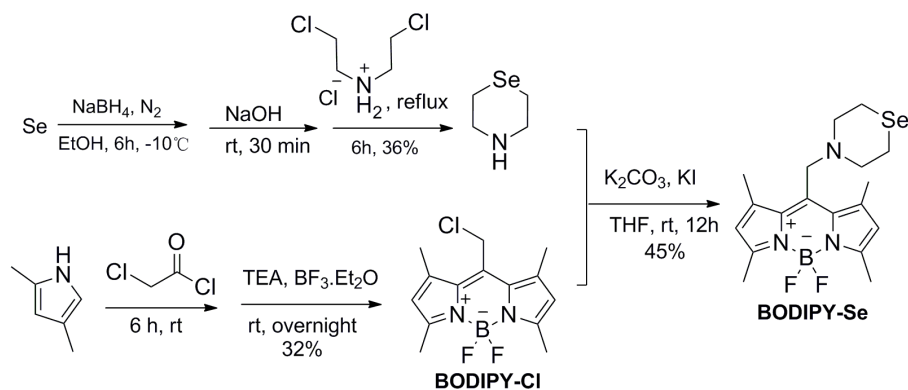

**Scheme S1.** Synthetic route of fluorescent probe BODIPY-Se.

**Table S1.** Properties of the reported lysosome-targeted fluorescent probes for H<sub>2</sub>O<sub>2</sub>.

| Probes           | Signaling mode | $\lambda_{em-max}$ | LOD          | Response time | Application                                                                                                                                                                               | References                                            |
|------------------|----------------|--------------------|--------------|---------------|-------------------------------------------------------------------------------------------------------------------------------------------------------------------------------------------|-------------------------------------------------------|
|                  | Turn-on        | 676                | 0.21 $\mu$ M | 25 min        | Monitoring H <sub>2</sub> O <sub>2</sub> in living cells                                                                                                                                  | Anal. Methods, 2018, 10, 3754–3758.                   |
|                  | Turn-on        | 606                | 0.06 $\mu$ M | 9 min         | Monitoring H <sub>2</sub> O <sub>2</sub> in living cells                                                                                                                                  | Analyst, 2017, 142, 4522–4528                         |
|                  | Turn-on        | 537                | 0.22 $\mu$ M | 60 min        | Detecting endogenous /exogenous H <sub>2</sub> O <sub>2</sub> ; Tissue-imaging Monitoring H <sub>2</sub> O <sub>2</sub> in living nematodes                                               | Chem. Commun., 2017, 53, 3701–3704                    |
|                  | Turn-on        | 584                | 0.23 $\mu$ M | 10 min        | Detecting endogenous /exogenous H <sub>2</sub> O <sub>2</sub>                                                                                                                             | Anal. Chem. 2016, 88, 5865–5870                       |
|                  | TP Turn-on     | 550                | 1.21 $\mu$ M | 160 seconds   | Monitoring H <sub>2</sub> O <sub>2</sub> in living cells; Detecting endogenous /exogenous H <sub>2</sub> O <sub>2</sub> .                                                                 | Biosensors and Bioelectronics, 2016, 79, 79, 237–243. |
|                  | Turn-on        | 528                | --           | 30 min        | Detecting endogenous /exogenous H <sub>2</sub> O <sub>2</sub> .                                                                                                                           | Scientific reports, 2015, 5, 8488.                    |
| <b>This work</b> | Turn-on        | 504                | 0.13 $\mu$ M | 5 min         | Monitoring H <sub>2</sub> O <sub>2</sub> in living cells; Detecting endogenous /exogenous H <sub>2</sub> O <sub>2</sub> ; Monitoring H <sub>2</sub> O <sub>2</sub> in living zebrafishes. |                                                       |

### **Quantum yield**

The quantum yield ( $\Phi_F$ ) was calculated according to the equation:  $\Phi_F = \Phi_{ref} (A_{ref}S_{sample}/A_{sample}S_{ref}) (n_{sample}/n_{ref})$ . Where A is the absorbance at the excitation wavelength, S is the area under the corrected emission curve, and n is the refractive index of the solvents used. Subscripts “Sample” and “ref” refer to the standard and to the unknown, respectively.

### **Cell culture**

Cells were cultured in DMEM (Dulbecco's modified Eagle's medium) supplemented with 10% FBS (fetal bovine serum) in an atmosphere of 5% CO<sub>2</sub> and 95% air at 37 °C.

### **Imaging of H<sub>2</sub>O<sub>2</sub> in living cells**

#### **a) Imaging of exogenous H<sub>2</sub>O<sub>2</sub> in MCF-7 cells**

The MCF-7 cells were plated on 6-well plates and allowed to adhere for 24 h. The cells were washed with PBS (pH=7.4) buffer three times. Subsequently, incubating with the probe BODIPY-Se (2 μM) (containing 0.1 % DMSO as a co-solvent) for another 30 min at 37 °C, the MCF-7 cells were rinsed with PBS three times, and the cells were incubated with (0, 10, 30 and 50 μM) H<sub>2</sub>O<sub>2</sub> for 30 min at 37 °C, and then washed with PBS three times, and the fluorescence images were acquired through confocal microscopy fluorescence imaging.

#### **b) Imaging of endogenous H<sub>2</sub>O<sub>2</sub> in MCF-7 cells**

The MCF-7 cells were plated on 6-well plates and allowed to adhere for 24 h and then PMA treated for 30 min. The cells were washed with PBS (pH=7.4) buffer. Subsequently, incubating with probe BODIPY-Se (2 μM) (containing 0.1 % DMSO as a co-solvent) for another 30 min at 37 °C, and then washed with PBS three times, and the fluorescence images were acquired through confocal microscopy fluorescence imaging.

#### **c) Imaging of MCF-7 cells under stimulus of ascorbic acid**

The MCF-7 cells were plated on 6-well plates and allowed to adhere for 24 h and then different concentrations of VC (0 mM, 0.5 mM, 0.7 mM and 1.0 mM) for 24 h. The cells were washed with PBS (pH=7.4) buffer. Subsequently, incubating with probe BODIPY-Se (2 μM) (containing 0.1 % DMSO as a co-solvent) for another 30 min at 37 °C, and then washed with PBS three times, and the fluorescence images were acquired through confocal microscopy fluorescence imaging.

### **Cells cytotoxicity assay**

The (3-(4, 5-dimethylthiazol-2-yl)-2, 5-diphenyltetrazolium bromide) MTT assay was used to test the cytotoxicity of probe to HepG 2 cells. Cells were planted in 36-well flat-bottomed plates and maintained at 37 °C under 5% CO<sub>2</sub> atmosphere. After 24 h, different concentration probes were incubated with HepG2 cells for 3 h in fresh medium, respectively. Then, 10 μL of MTT solution (10 mg/ml, PBS) was added into each well after cells were rinsed with cold phosphate buffered saline (PBS, pH 7.40) 5 times and further incubated for 24 h. Afterwards, the remaining MTT solution was removed from wells, and 150 μL of DMSO was added into each well to dissolve the intracellular blue-violet formazan crystals. The absorbance of the solution is observed at 490 nm

via a microplate reader.

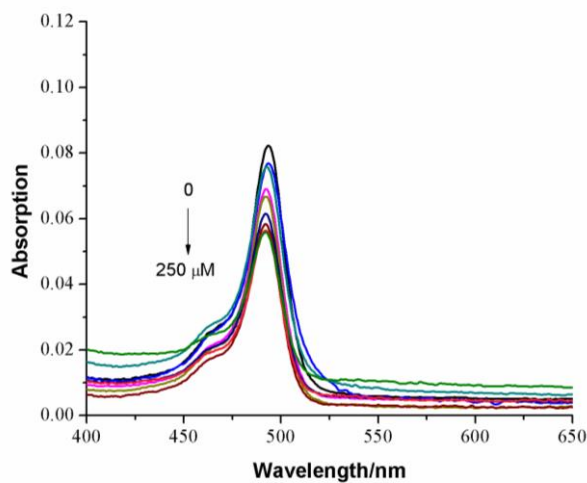

**Fig. S1** Absorption spectra of BODIPY-Se at different concentrations of H<sub>2</sub>O<sub>2</sub> in EtOH-PBS solution (v/v, 1/1, pH=5.0). [H<sub>2</sub>O<sub>2</sub>]= 0-250 μM.

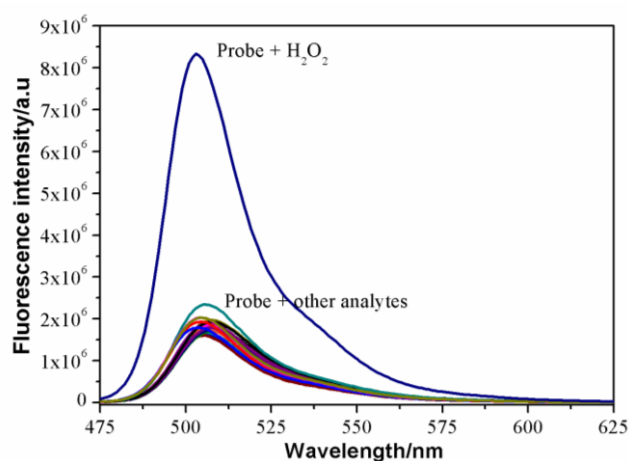

**Fig. S2** Fluorescence responses of probe (10 μM) toward H<sub>2</sub>O<sub>2</sub> and other substances in EtOH-PBS solution (v/v, 1/1, pH=5.0) for 30 min at room temperature. (0) Probe only. (1-5) Fe<sup>3+</sup>, Hg<sup>2+</sup>, Cr<sup>3+</sup>, Mg<sup>2+</sup>, Cu<sup>2+</sup> (500 μM for each). (6-10) GSH, Cys, Hcy, SO<sub>3</sub><sup>2-</sup>, S<sup>2-</sup> (500 μM for each). (11-20) NO<sub>2</sub><sup>-</sup>, NO<sub>3</sub><sup>-</sup>, NO, TBO<sup>-</sup>, TBOH, <sup>1</sup>O<sub>2</sub>, ONOO<sup>-</sup>, ClO<sup>-</sup>, OH<sup>-</sup>, H<sub>2</sub>O<sub>2</sub> (200 μM for each). λ<sub>ex</sub>= 460 nm.

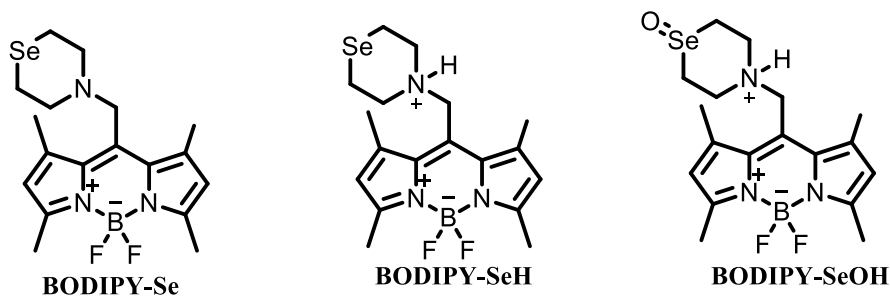

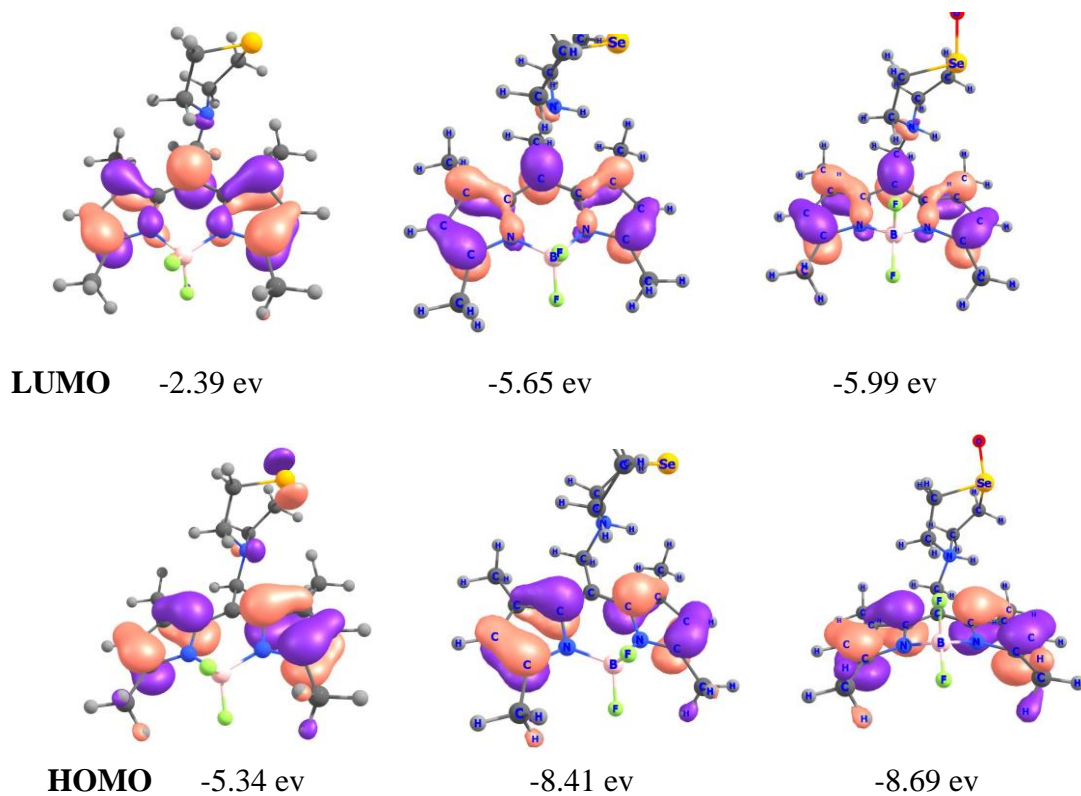

**Fig. S3** The molecular orbitals for the ground states of BODIPY-Se, BODIPY-SeH, BODIPY-SeOH based on DFT (B3LYP/6-31G\*) calculations.

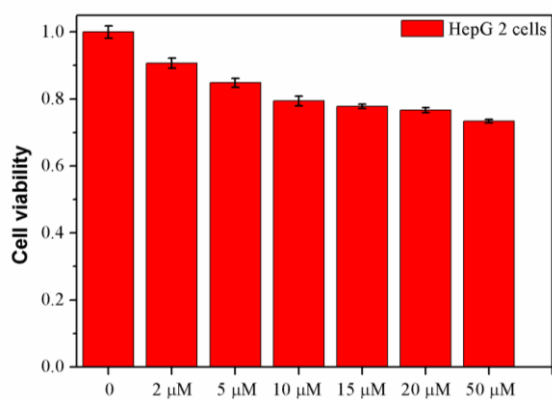

**Fig. S4** Cytotoxicity of different concentrations of BODIPY-Se to HepG 2 cells by a standard MTS assay, the experiment was repeated five times and the data are shown as mean ( $\pm$ S.D.).

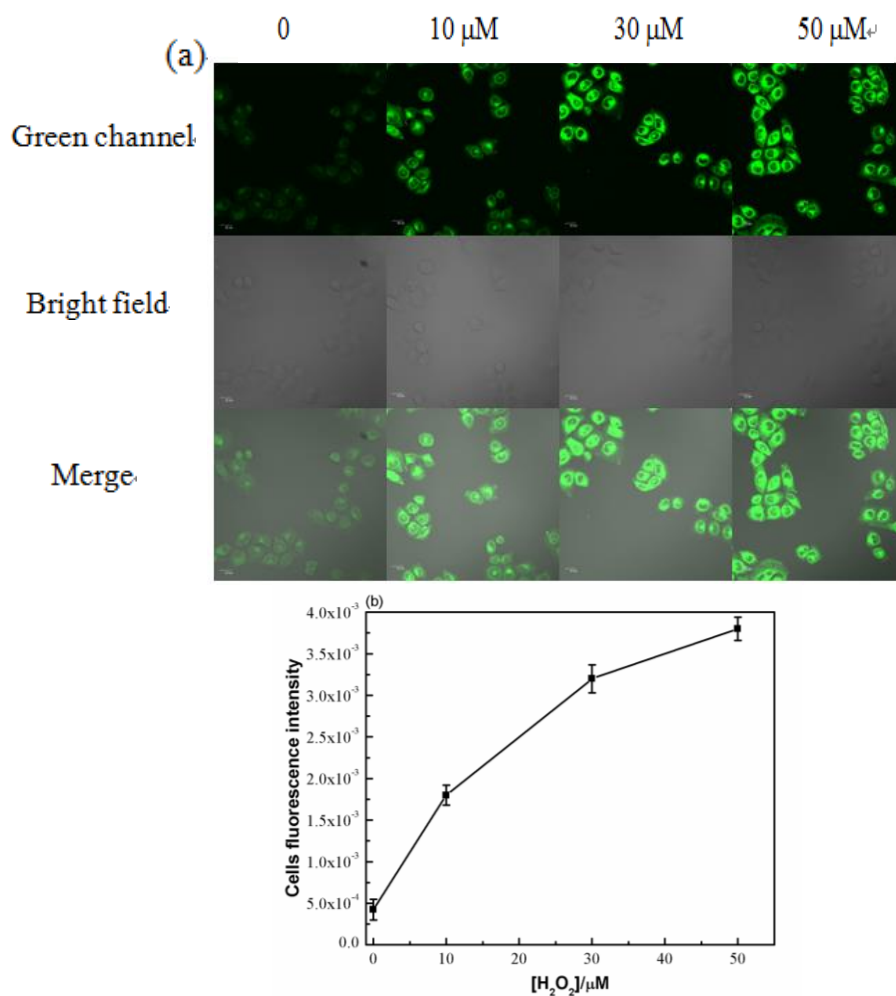

**Fig. S5** (a) Fluorescence images of HepG 2 cells treated with 2  $\mu\text{M}$  BODIPY-Se and then incubated with PBS solution, 10  $\mu\text{M}$ , 30  $\mu\text{M}$ , and 50  $\mu\text{M}$   $\text{H}_2\text{O}_2$ . Fluorescence intensities were collected at 490–530 nm in green channel. (b) Average fluorescence intensities of images under different concentrations of  $\text{H}_2\text{O}_2$  in green channels.

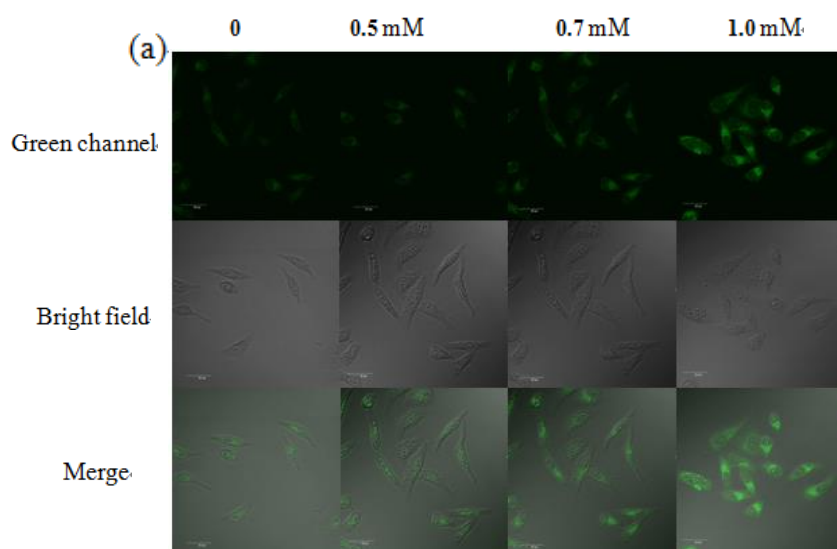

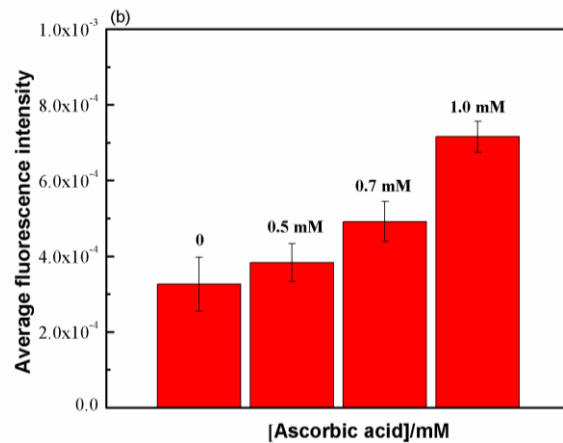

**Fig. S6** (a) Fluorescence images of MCF-7 cells treated with 2  $\mu$ M BODIPY-Se and then incubated with different concentrations of vitamin C (0 mM, 0.5 mM, 0.7 mM and 1.0 mM). Fluorescence intensities were collected at 490–530 nm in green channel. (b) Average fluorescence intensities of images under different concentrations of vitamin C in green channels.

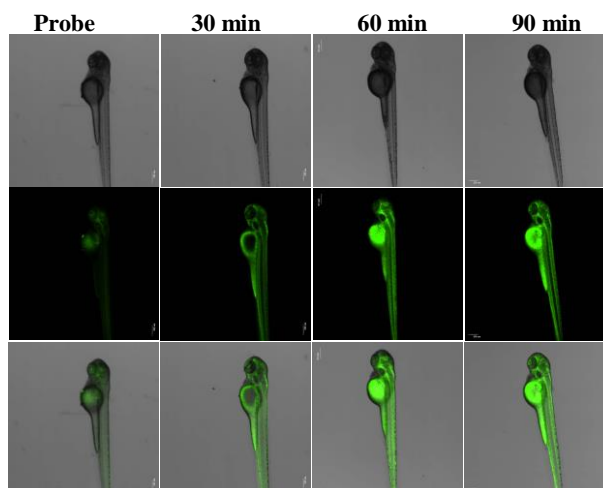

**Fig. S7** Confocal fluorescence images in zebrafish embryos incubated with probe BODIPY-Se and subsequently treated with 10  $\mu$ M H<sub>2</sub>O<sub>2</sub> for different time: 30 min, 60 min, 90 min. Top: Bright field. Middle: Fluorescence images of zebrafish embryos in Green channel. Bottom: Merged images between fluorescence images and bright field. Scale bar: 200  $\mu$ m. Confocal image from green channel ( $\lambda_{\text{ex}} = 488 \text{ nm}$ ,  $\lambda_{\text{em}} = 500\text{-}600 \text{ nm}$ ).

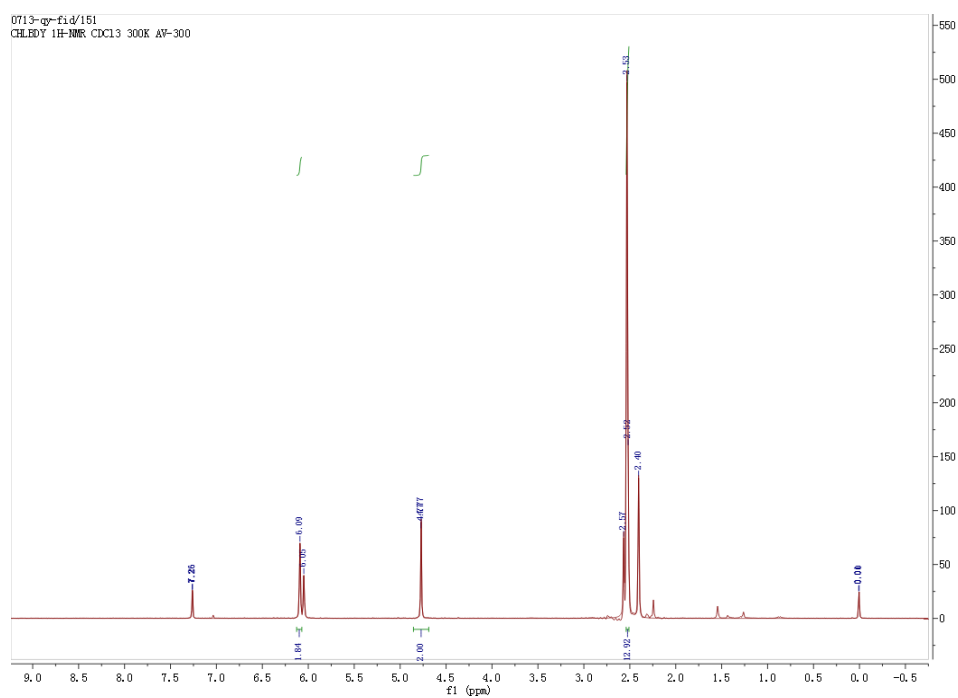

**Fig. S8**  $^1\text{H}$  NMR spectrum ( $\text{CDCl}_3$ , 300 MHz) of BODIPY-Cl

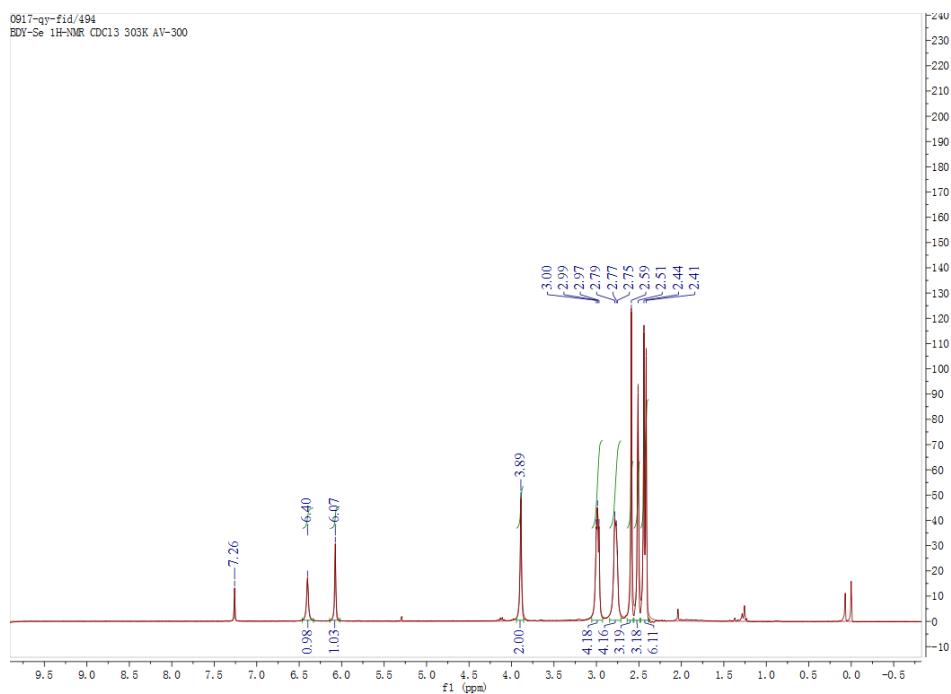

**Fig. S9**  $^1\text{H}$  NMR spectrum ( $\text{CDCl}_3$ , 300 MHz) of BODIPY-Se



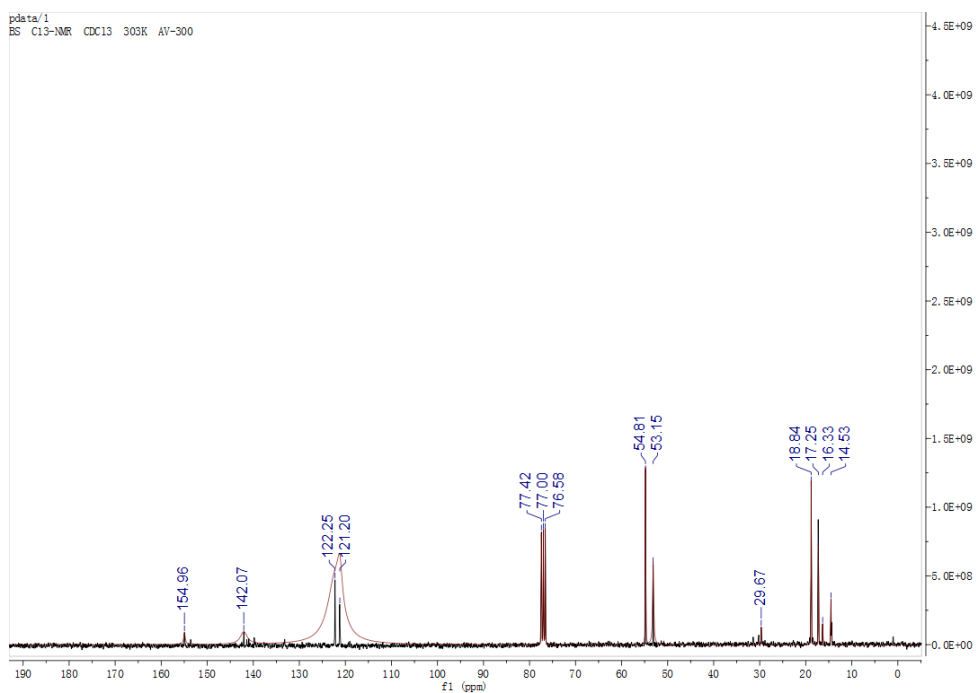

**Fig. S10**  $^{13}\text{C}$  NMR spectrum ( $\text{CDCl}_3$ , 75 MHz) of BODIPY-Se

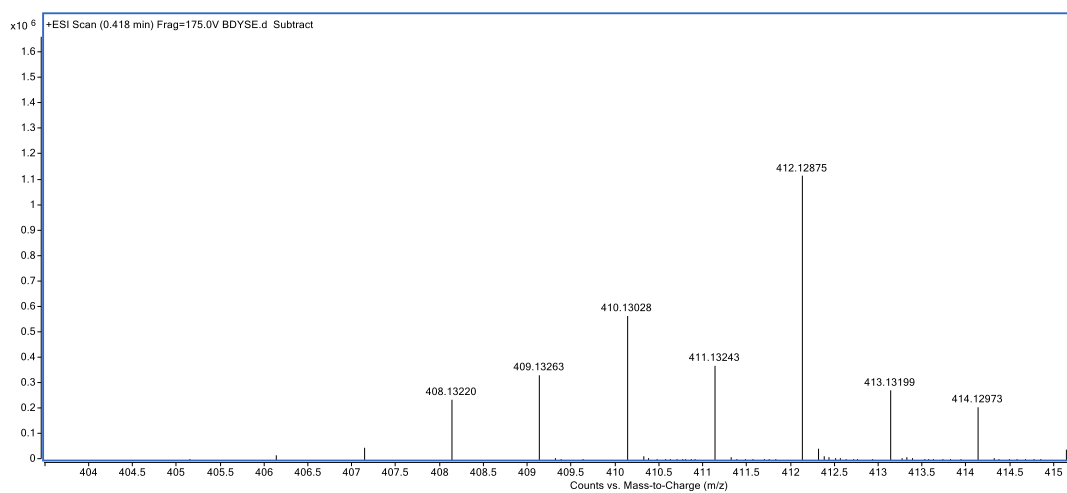

**Fig. S11** MS spectrum of BODIPY-Se

Sample Name  
User Name  
Sample Type  
ACQ Method

BDY-Se-2  
0621.m

Position Vial 23  
Inj Vol 1  
IRM Calibration Status Success  
Comment

Instrument Name Instrument 1  
InjPosition  
Data Filename BDY-Se-2-.d  
Acquired Time 6/21/2017 8:59:46 PM (UTC+08:00)

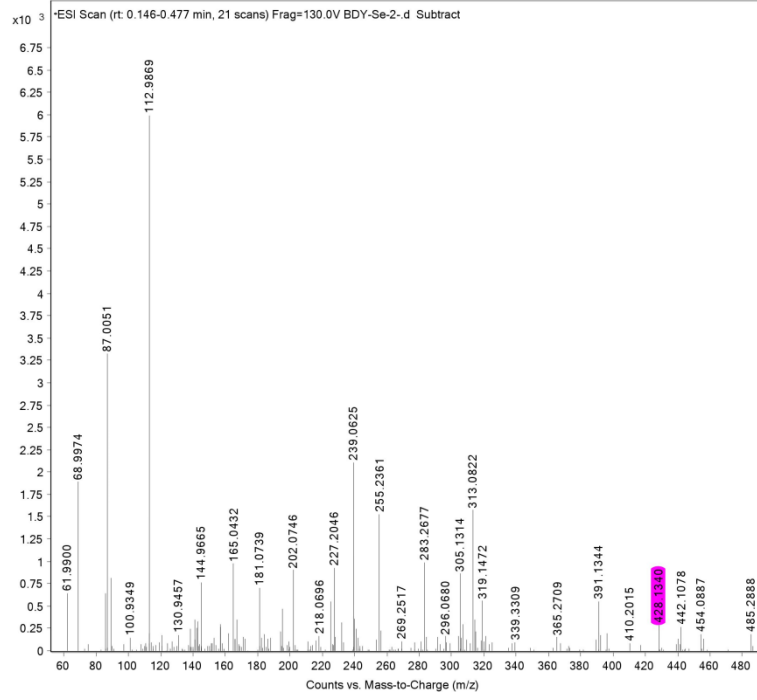

Fig. S12 ES-MS spectrum of BODIPY-Se in the presence of H<sub>2</sub>O<sub>2</sub>
